# Supplementary material for: Platinum and indium sulfide-modified Cu3BiS3photocathode for photoelectrochemical hydrogen evolution
Source: Royal Society of Chemistry journal article supplement (doi:10.1039/c7ta02740k), 2017-01-01
Supplement: c7ta02740k1.pdf [file c7ta02740k1.pdf]

Electronic Supporting Information (ESI) for

**Platinum and indium sulfide-modified Cu<sub>3</sub>BiS<sub>3</sub> photocathode for  
photoelectrochemical hydrogen evolution**

Sunao Kamimura,<sup>1,2</sup> Naoki Beppu,<sup>1</sup> Yousuke Sasaki,<sup>1</sup> Toshiki Tsubota,<sup>1</sup> and Teruhisa Ohno<sup>1,3\*</sup>

<sup>1</sup>Department of Applied Chemistry, Faculty of Engineering, Kyushu Institute of Technology, 1-1 Sensuicho, Tobata, Kitakyushu 804-8550, Japan

<sup>2</sup>PRESTO, Japan Science and Technology Agency, 4-1-8 Honcho, Kawaguchi-shi, Saitama 322-0012, Japan

<sup>3</sup> ACT-C, Japan Science and Technology Agency, 4-1-8 Honcho, Kawaguchi-shi, Saitama 322-0012, Japan

\*Corresponding author: tohno@che.kyutech.ac.jp

< Contents >

**ESI. Fig. S1** Time course data for applied voltage during electrodeposition.

**ESI. Fig. S2** Current-potential curves for Pt-Cu<sub>3</sub>BiS<sub>3</sub>, Pt-CdS/Cu<sub>3</sub>BiS<sub>3</sub> and Pt-In<sub>2</sub>S<sub>3</sub>/Cu<sub>3</sub>BiS<sub>3</sub>.

**ESI. Fig. S3** Current-potential curves for Cu<sub>3</sub>BiS<sub>3</sub>, Pt-Cu<sub>3</sub>BiS<sub>3</sub>, In<sub>2</sub>S<sub>3</sub>/Cu<sub>3</sub>BiS<sub>3</sub> and Pt-In<sub>2</sub>S<sub>3</sub>/Cu<sub>3</sub>BiS<sub>3</sub>.

**ESI. Table S1** ICP-AES analysis for aqueous electrolyte before and after photoelectrochemical reaction.

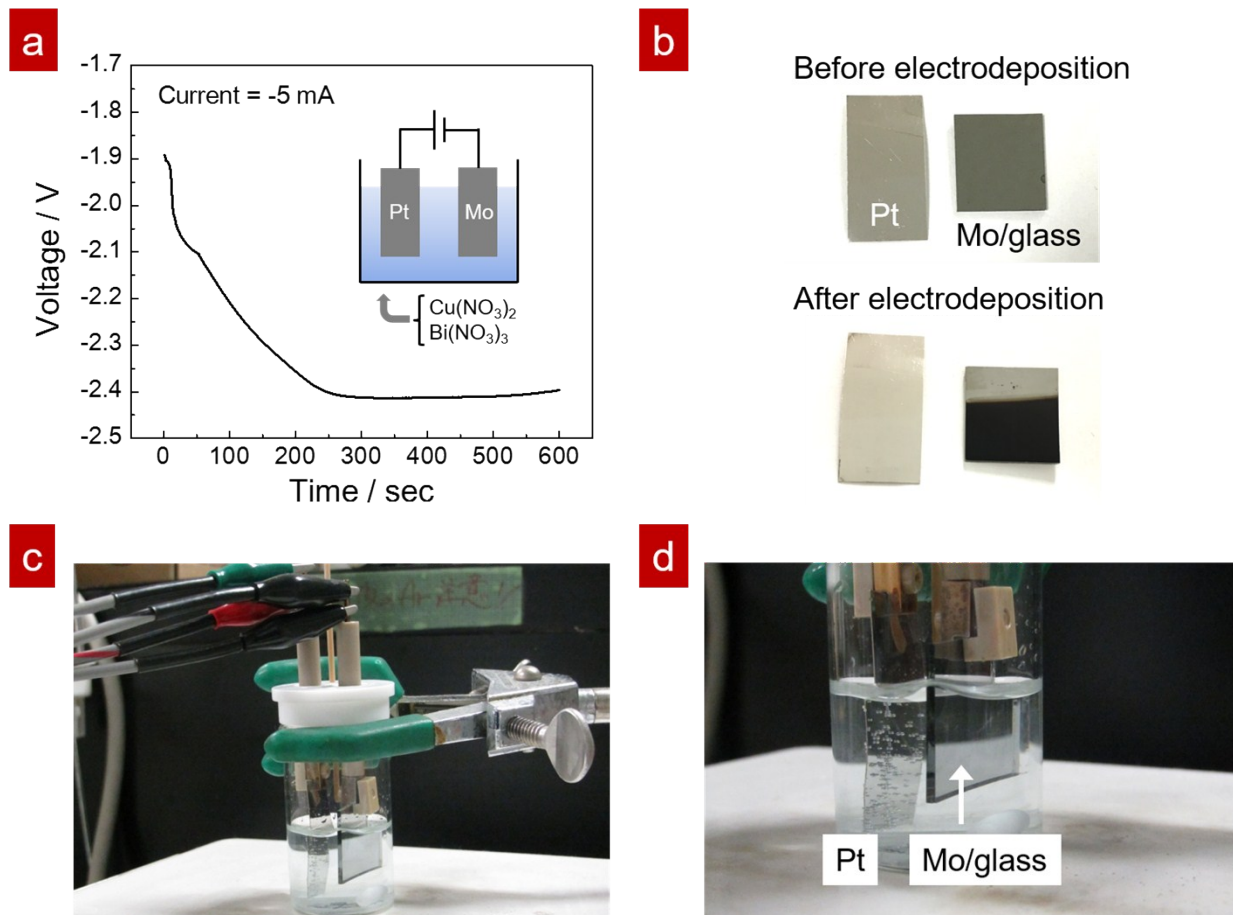

**Fig. S1** (a) Time course data for applied voltage during electrodeposition. (b) Photographs of each electrodes before and after electrodeposition. As seen in these photographs, black Cu/Bi layer was deposited over Mo/glass substrate after electrodeposition, while Pt was no notable difference in the appearances. (c) Experimental photograph during electrodeposition. (d) Enlarged photograph. The small bubble was clearly observed over Pt electrode, which attributed to the oxygen gas.

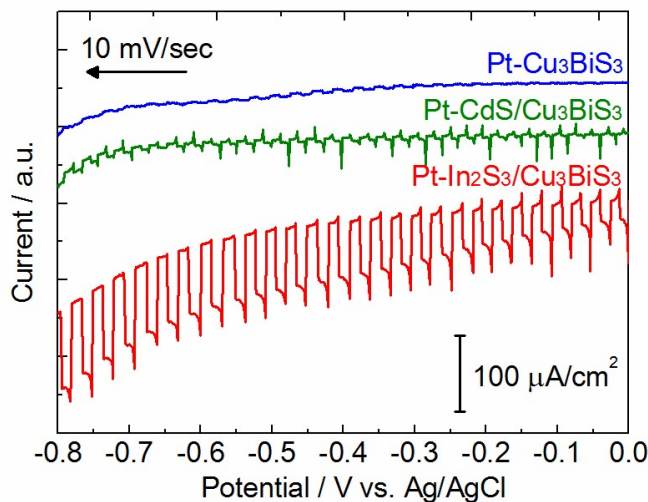

**Fig. S2.** Comparison of current-potential curves for Pt-Cu<sub>3</sub>BiS<sub>3</sub>, Pt-CdS/Cu<sub>3</sub>BiS<sub>3</sub> and Pt-In<sub>2</sub>S<sub>3</sub>/Cu<sub>3</sub>BiS<sub>3</sub> in 0.1M Na<sub>2</sub>SO<sub>4</sub> aqueous solution (pH 6) under AM1.5G simulated solar light. The CdS buffer layer was deposited over the Cu<sub>3</sub>BiS<sub>3</sub> electrode by chemical bath deposition method, which procedure has been reported in our previous work (S. Kamimura *et al.*, RSC advances, 2016, 6, 112594-112601).

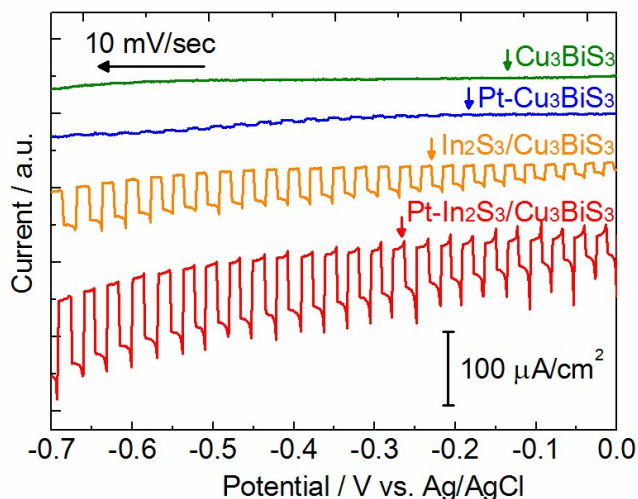

**Fig. S3.** Current-potential curves for Cu<sub>3</sub>BiS<sub>3</sub>, Pt-Cu<sub>3</sub>BiS<sub>3</sub>, In<sub>2</sub>S<sub>3</sub>/Cu<sub>3</sub>BiS<sub>3</sub> and Pt-In<sub>2</sub>S<sub>3</sub>/Cu<sub>3</sub>BiS<sub>3</sub> in 0.1M Na<sub>2</sub>SO<sub>4</sub> aqueous solution (pH 6) under an irradiation of AM1.5G simulated solar light.



**Table 1.** ICP-AES analysis for aqueous electrolyte before and after photoelectrochemical reaction.

|                     | Emission intensities of elements (a.u.) |        |      |    |
|---------------------|-----------------------------------------|--------|------|----|
|                     | Cu                                      | Bi     | In   | S  |
| Before <sup>a</sup> | 0.027                                   | 0.0077 | 0.22 | -- |
| After <sup>b</sup>  | 0.028                                   | 0.0063 | 0.25 | -- |

(a) As-prepared 0.1 M Na<sub>2</sub>SO<sub>4</sub> aqueous electrolyte. (b) 0.1 M Na<sub>2</sub>SO<sub>4</sub> aqueous electrolyte after photoelectrochemical reaction by using Pt-In<sub>2</sub>S<sub>3</sub>/Cu<sub>3</sub>BiS<sub>3</sub> electrode.
